# Supplementary material for: Structural and Functional Insights into a Previously Uncharacterized Psr LCP Protein from Streptococcus dysgalactiae subsp. dysgalactiae
Source: Research Square preprint supplement (doi:10.21203/rs.3.rs-8368946/v1), 2025-12-25
Supplement: Supplementary file 1 [file a2982d8d89636c6ee31445be.docx]

**Supplementary material for:**

**Structural and Functional Insights into a Previously Uncharacterized Psr LCP Protein from Streptococcus dysgalactiae subsp. dysgalactiae**

João Paquete-Ferreiraa, b, Leonor Torresa, b, Joana Brytona, b, Marino F. A. Santosa, b, Márcia A. S. Correiaa, b, Alexandra R. Fernandesa,c, Maria João Romãoa, b, Aldino Viegasa, b and Teresa Santos-Silvaa, b, #

aAssociate Laboratory i4HB - Institute for Health and Bioeconomy, NOVA School of Science and Technology, Universidade NOVA de Lisboa, 2819-516 Caparica, Portugal; bUCIBIO, Department of Chemistry, NOVA School of Sciences and Technology, Universidade NOVA de Lisboa, 2829-516, Caparica, Portugal; cUCIBIO, Department of Life Sciences, NOVA School of Sciences and Technology, Universidade NOVA de Lisboa, 2829-516, Caparica, Portugal

Here we include supplementary figures for the AF2 predicted models (Figure SM 1), eequence alignment of the LCP domains (Figure SM 2) and control NMR experiments (Figure SM 3). Additionally, we include a table indicating the primers used for Psr LCP domain cloning (Table SM 1)


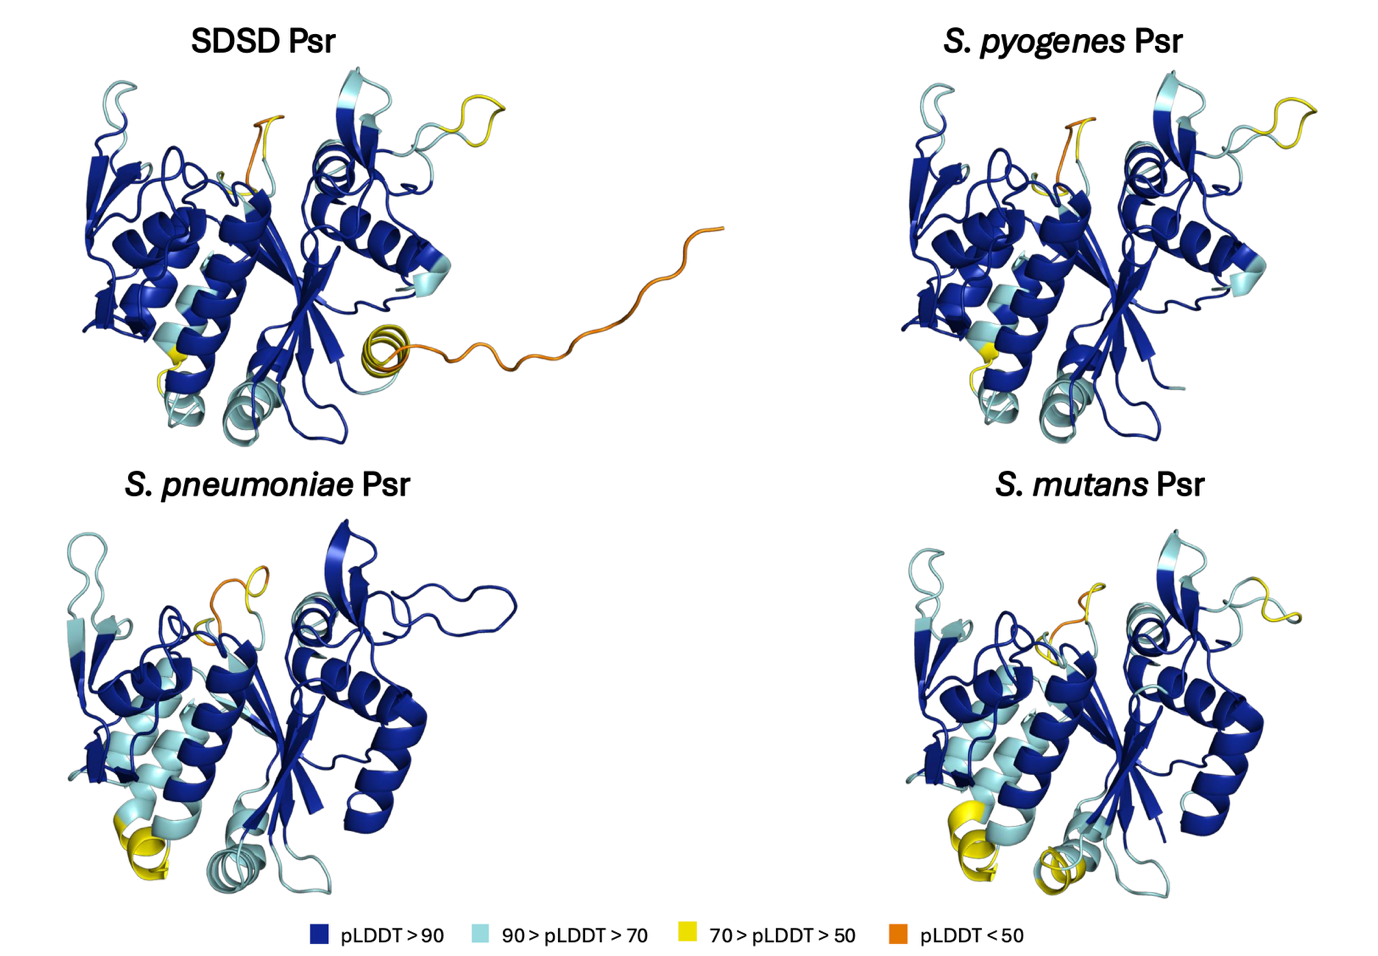


Figure S1: AF2 predicted models for the LCP domains of the Psr proteins from *S. dysgalactiae subsp. dysgalactiae* (SDSD), *S. pyognenes*, *S. mutans*, and *S. pneumoniae*, colored by pLDDT.


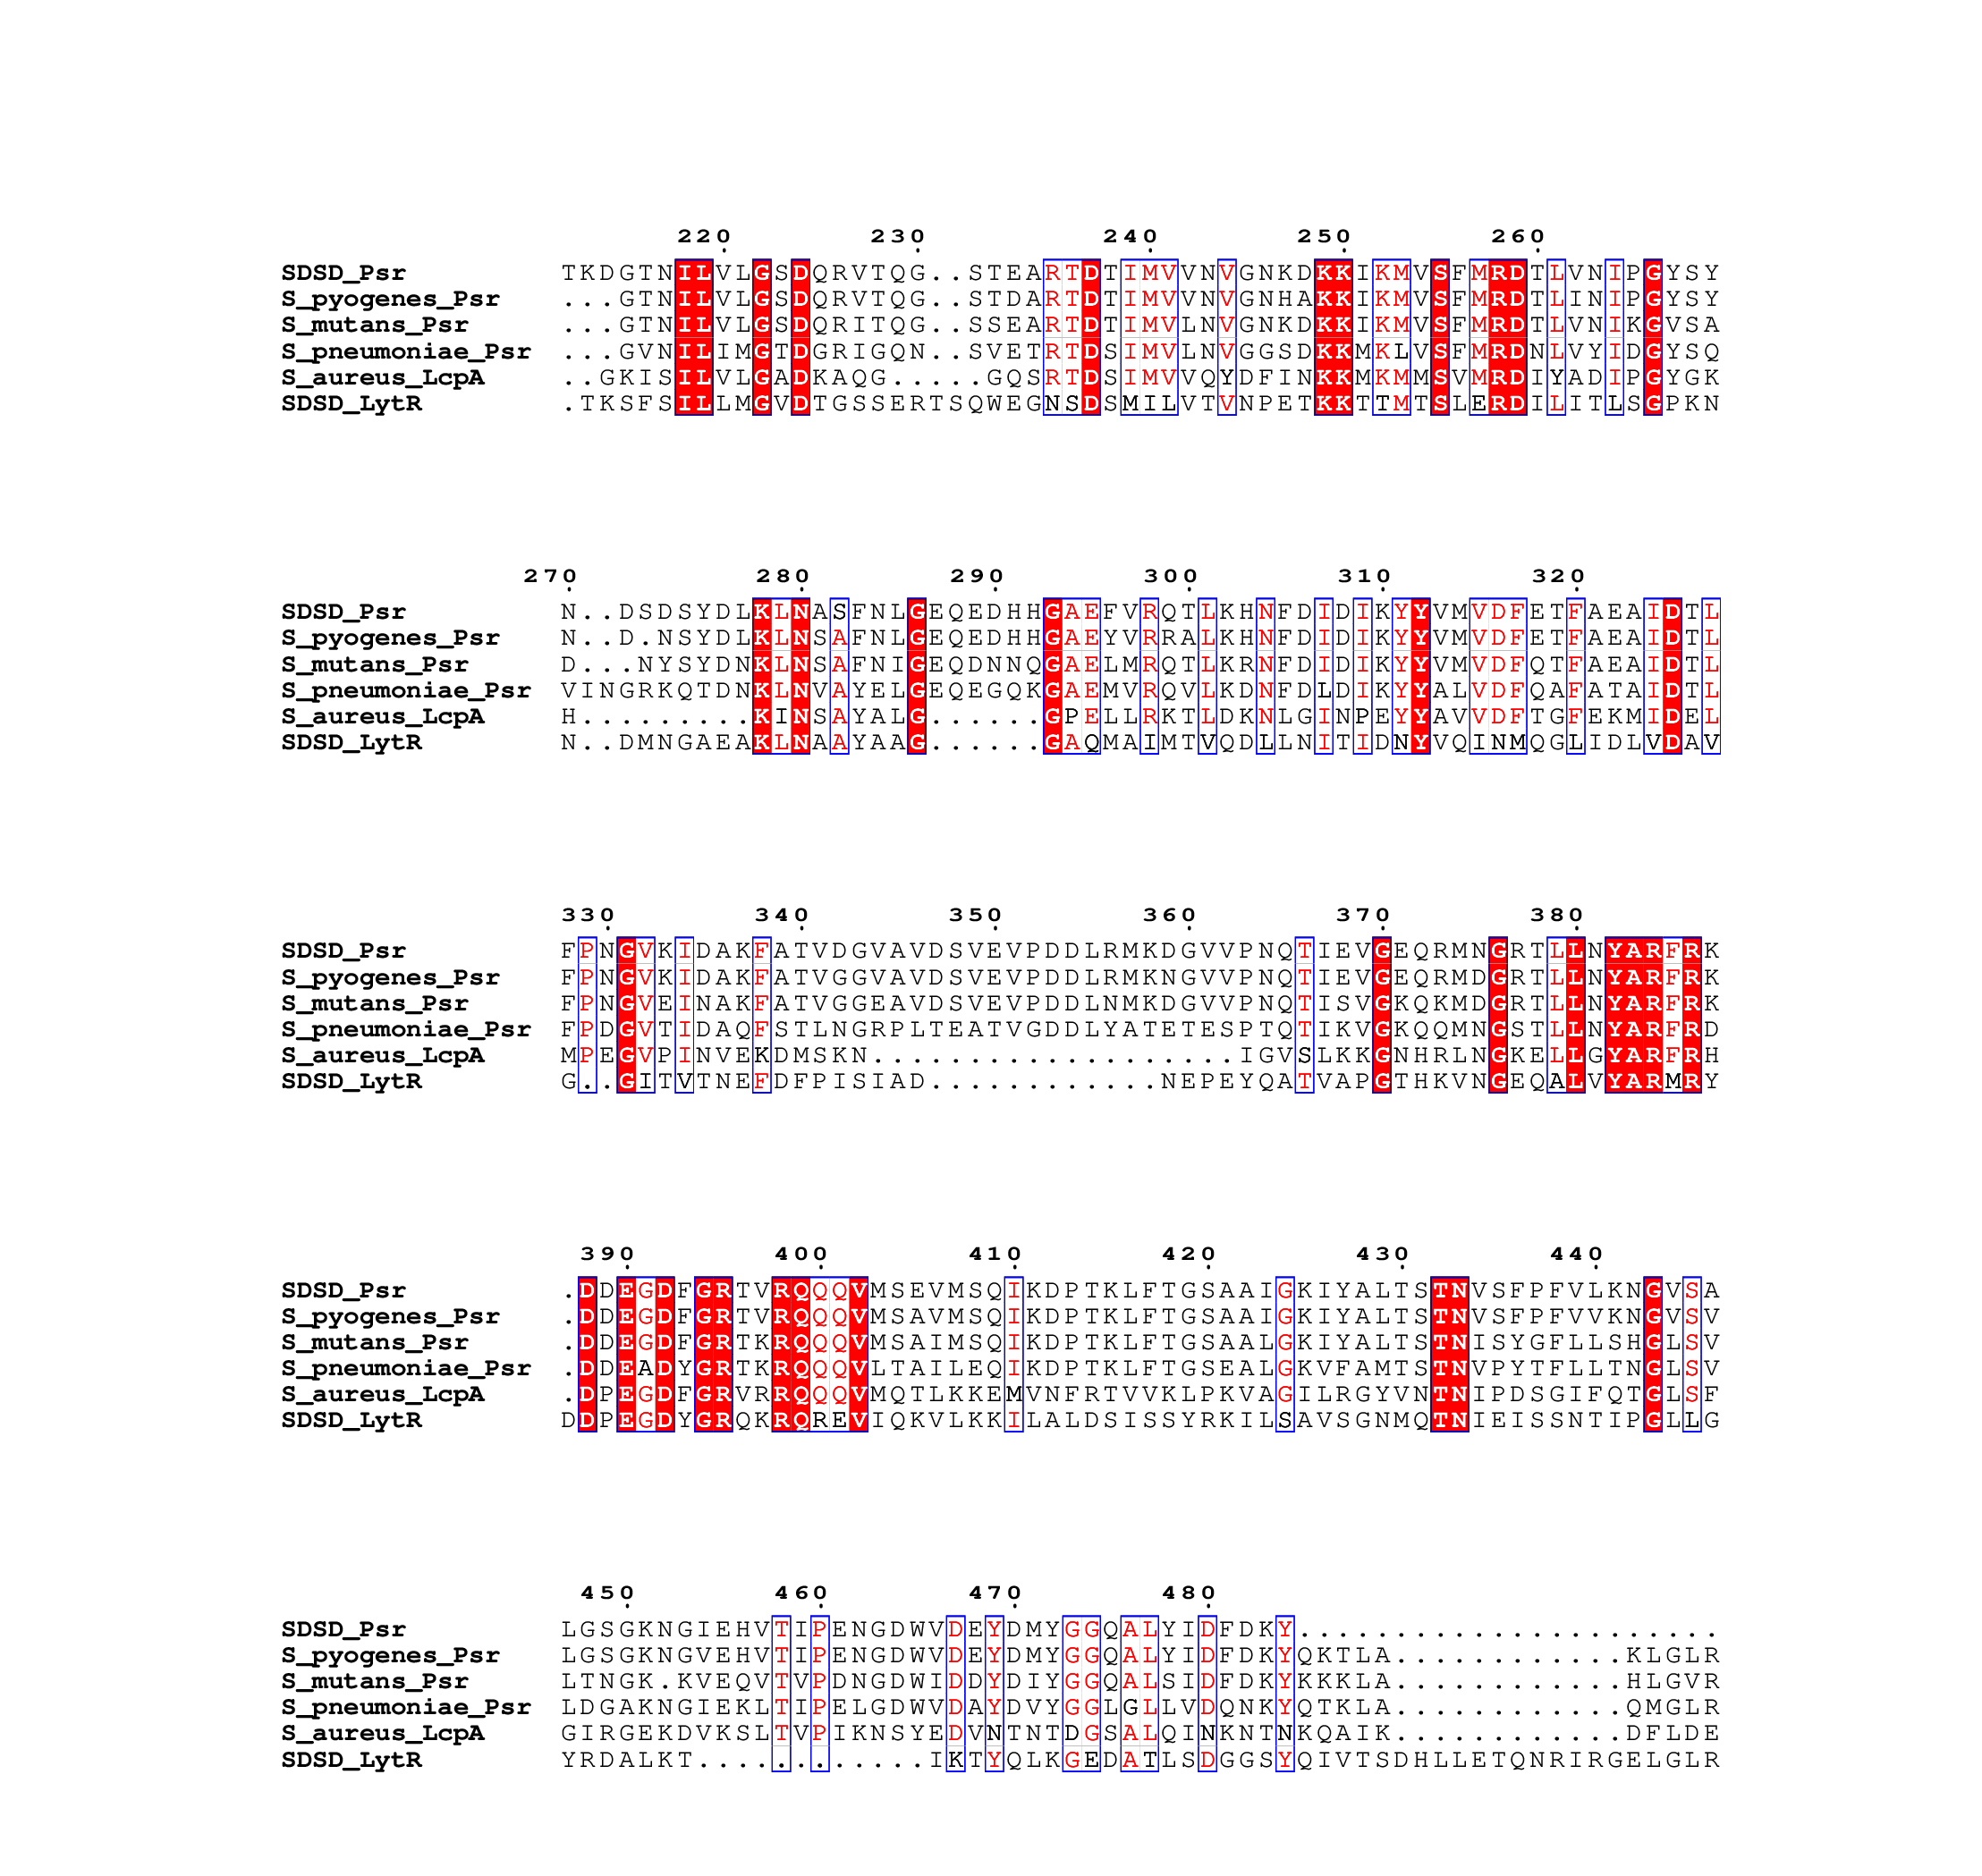


Figure S2: Sequence alignment of the LCP domains of the Psr proteins from *S. dysgalactiae subsp.*

*dysgalactiae* (SDSD), *S. pyognenes*, *S. mutans*, *S. pneumoniae*, the LcpA from *S. aureus* and the LytR

from SDSD.


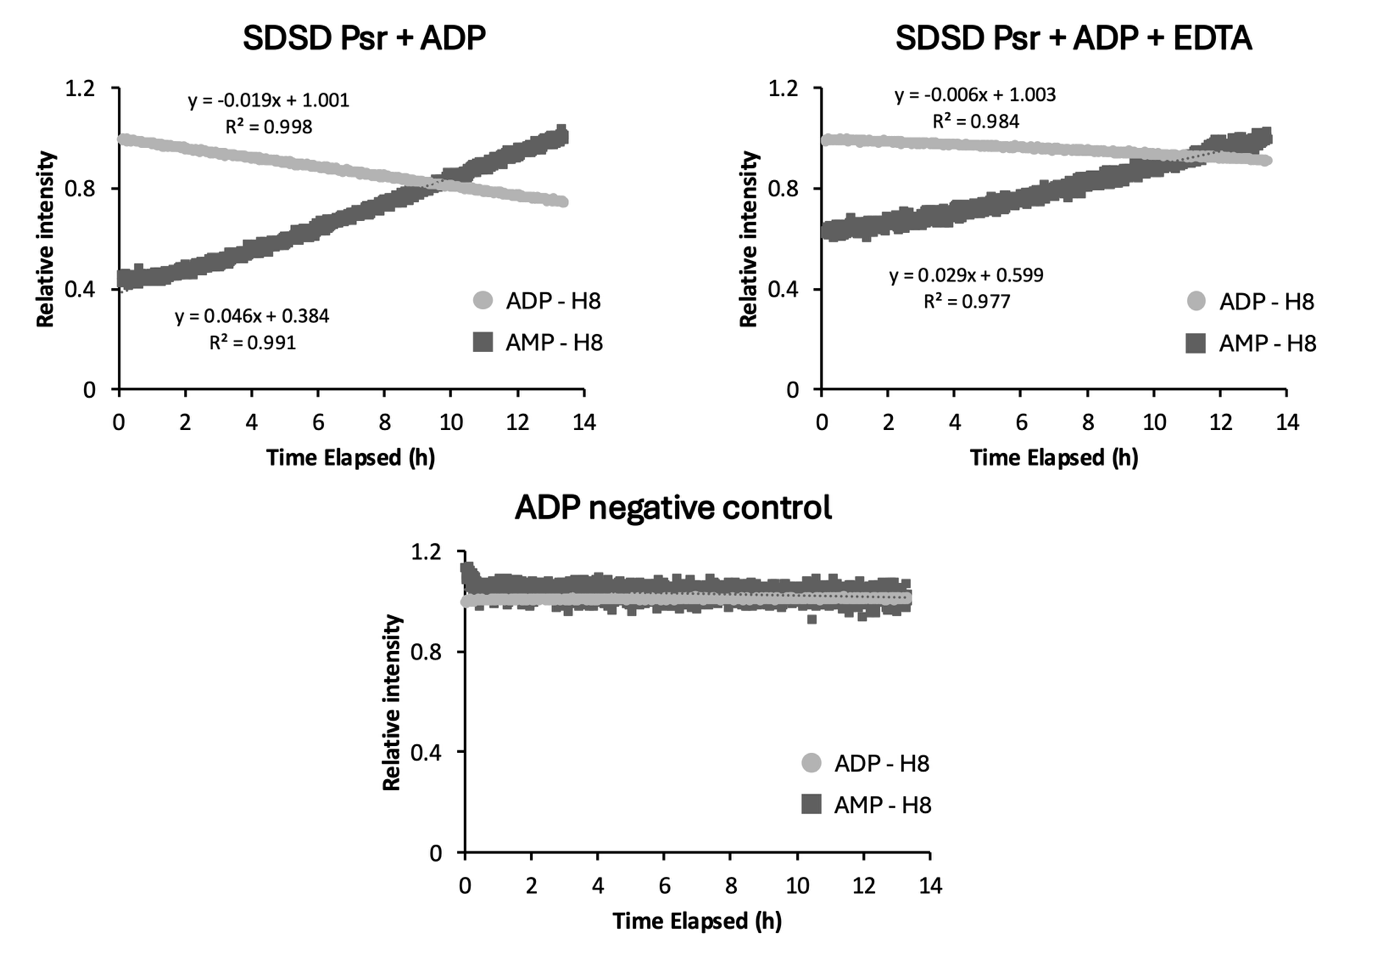


Figure S3: Control experiments in the presence of EDTA and protein absence. The control experiment in the presence of EDTA supports the Mg2+ dependence for the Psr protein, whereas the control experiment in the absence of protein shows the absence of ADP auto-hydrolysis.

Table S1: Primers used for Psr LCP domain cloning using the ligase-independent clonning (LIC) system.

|  | Primer Forward | Primer Reverse |
| --- | --- | --- |
| SDSD Psr LCP domain | TACTTCCAATCCATGACAAAGGATGGCACCAATATTCTCGTCTTGG | TATCCACCTTTACTGATATTTGTCAAAATCAATGTAAAGGGCTTGCCCACC |
